# Supplementary material
Source: PubMed Central journal article supplement (PMC3048715)
Supplement: supp_M110.184838_jbc.M110.184838-1.pdf [file supp_M110.184838_jbc.M110.184838-1.pdf]

## Supplemental Figure 1

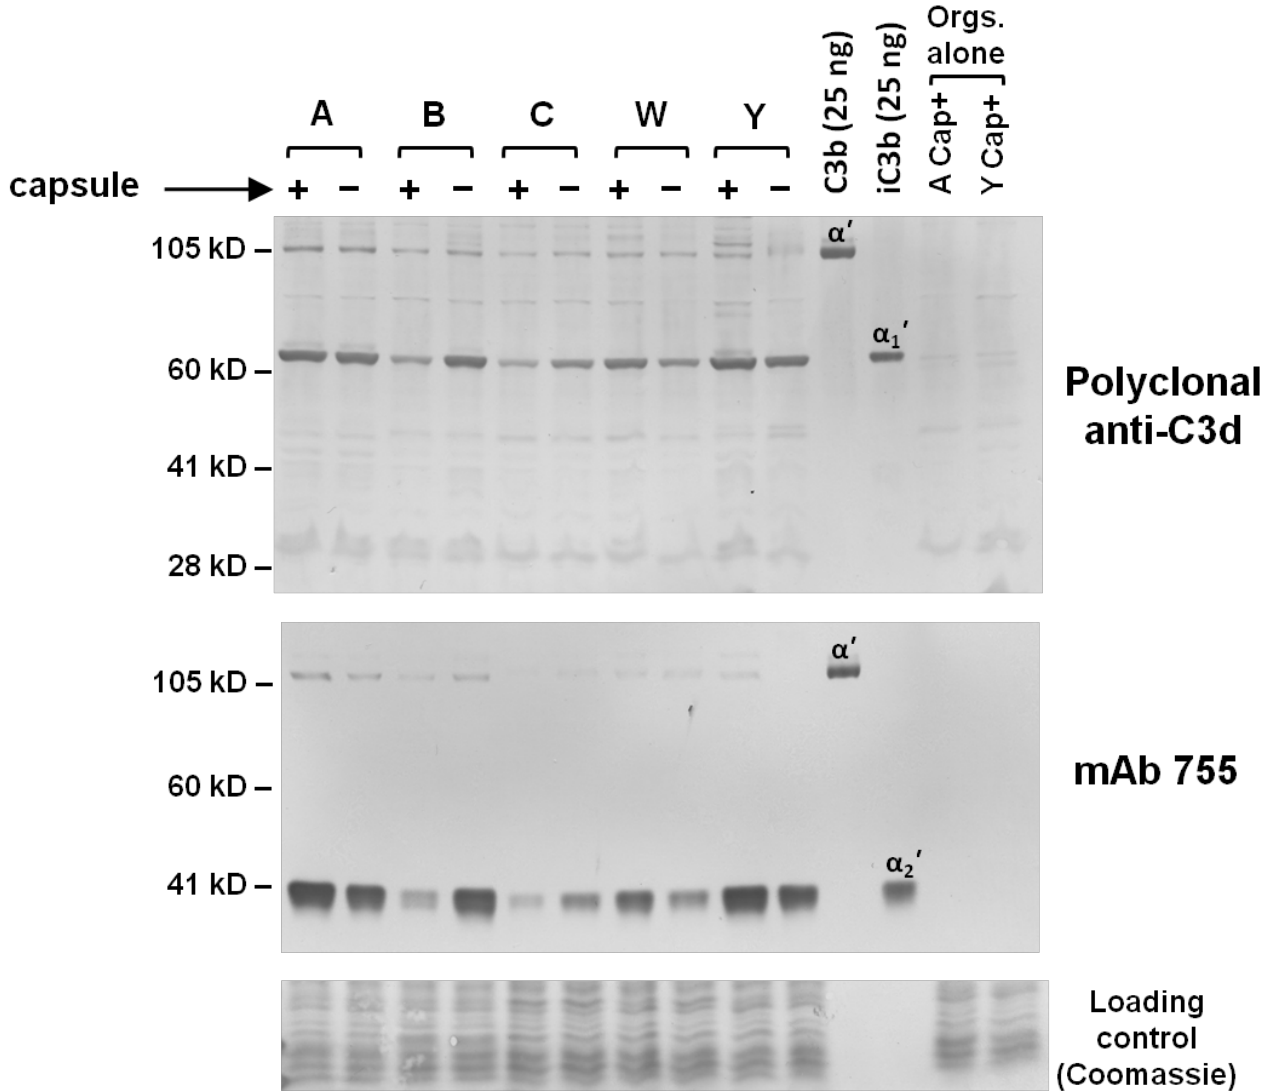

**Figure S1.** The predominant C3 fragment deposited on Lst, fHbp, NspA negative meningococci is iC3b. The five isogenic Cap<sup>+</sup> and Cap<sup>-</sup> pairs of *N. meningitidis* (one representative strains from group A, B, C, W-135 and Y) that lacked fHbp, NspA and LOS sialic acid were incubated with Mg/EGTA-NHS (25% (v/v)) for 30 min at 37 °C and C3 fragments bound to bacteria were released by treatment with methylamine, pH 11 (final concentration 1M) for 1 h at 37 °C. C3 fragments were detected using polyclonal chicken anti-human C3d (Quidel; Cat. No. A800) that recognizes the  $\alpha$  chain component of C3 and all its fragments (upper blot) or mAb 755 that recognizes the  $\alpha'$  chain of C3b (~106 kD) and the  $\alpha_2'$  chain of iC3b (~40 kD) (lower blot). Purified C3b and iC3b (25 ng each per lane) were used as controls to ascertain symmetric detection of the C3 fragments by the antibodies. The Coomassie stained lower section of the blot (proteins below ~25 kD) shows a representative loading control.

Supplemental Figure 2

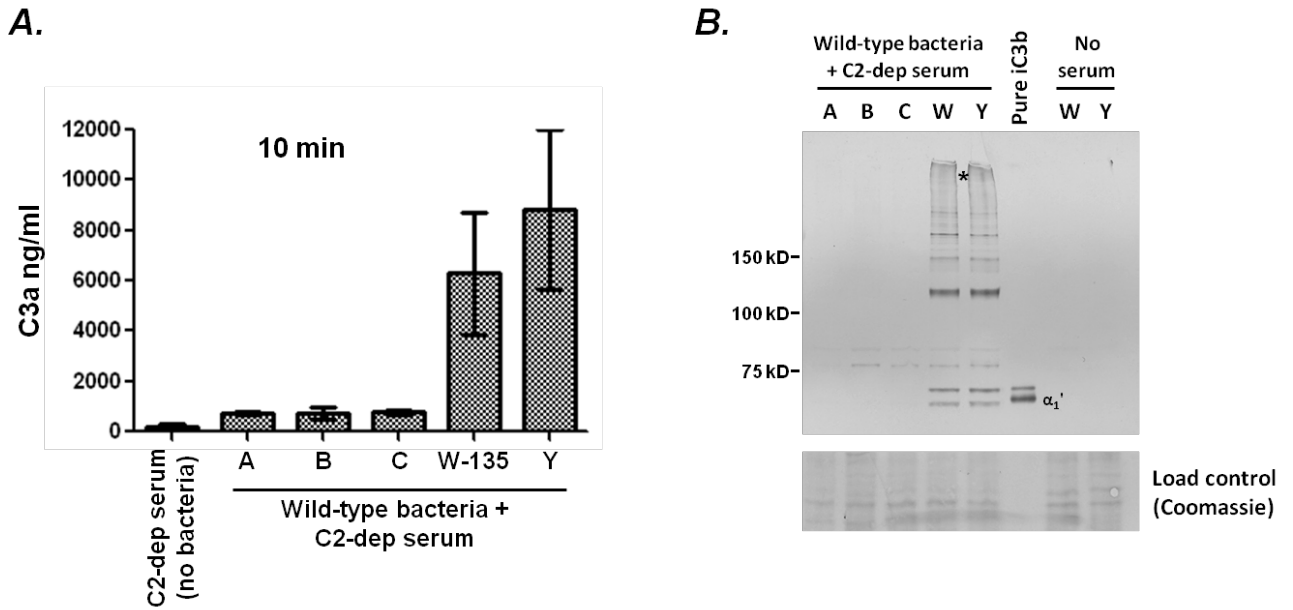

**Figure S2.** Increased rates of C3 activation and iC3b deposition on wild-type group W-135 and Y strains. **A.** Wild-type strains W171 (group W-135) and Y2220 (group Y) generate more C3a than wild-type strains A2594 (group A), H44/76 (group B) and C2120 (group C) at 10 min. Bacteria ( $10^8$  CFU) were incubated with C2-depleted human serum for 10 min at 37 °C and C3a generated in the reaction mixture was measured using the MicroVue C3a Plus EIA kit (Quidel). The mean ( $\pm$ SD) of two independent experiments is shown. **B.** iC3b is more rapidly deposited on wild-type group W-135 and Y meningococci. Bacteria were incubated with C2-depleted human serum as described in **A** and iC3b deposited on bacteria was assessed by western blotting using anti-C3b mAb G-3E. The asterisk indicates the location of high-molecular mass complexes that contain iC3b. Representative negative controls where the groups A and Y strains were not incubated with serum are also shown (lanes marked ‘Orgs. alone’). Loading was determined by Coomassie staining of the lower portion of the blot as described for Figure S1.
